# Supplementary material for: Mouse methylation profiles for leukocyte cell types, and estimation of leukocyte fractions in inflamed gastrointestinal DNA samples
Source: PubMed Central journal article supplement (PMC10553802; doi:10.1371/journal.pone.0290034), 2023-10-05
Supplement: pone.0290034.s001.pdf [file pone.0290034.s001.pdf]

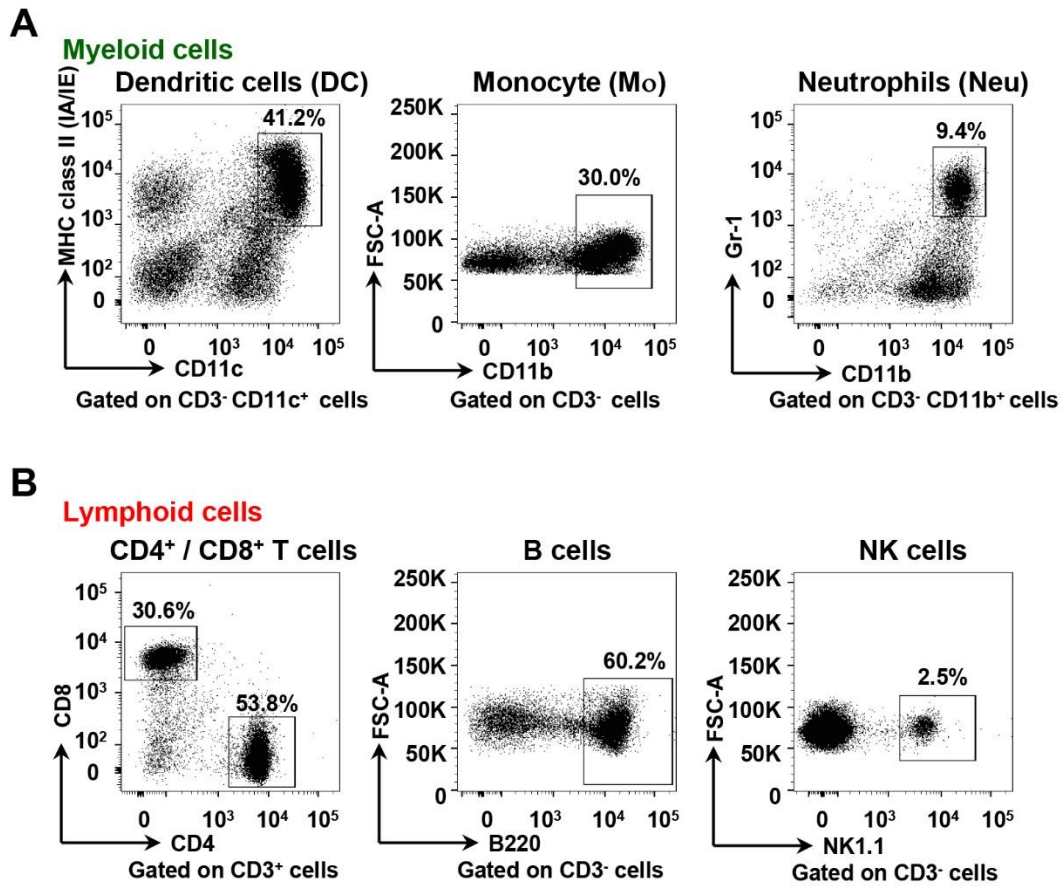**S1 Fig.**

Fraction of individual cell types among whole leukocytes. (A) The fraction among myeloid-lineage cells. Dendritic cells, monocytes, and neutrophils were separated by MACS. (B) The fraction among lymphoid-lineage cells. CD4<sup>+</sup>/CD8<sup>+</sup> T cell, B cells, and NK cells were separated by MACS.
