# Supplementary material for: Mouse methylation profiles for leukocyte cell types, and estimation of leukocyte fractions in inflamed gastrointestinal DNA samples
Source: PubMed Central journal article supplement (PMC10553802; doi:10.1371/journal.pone.0290034), 2023-10-05
Supplement: pone.0290034.s004.pdf [file pone.0290034.s004.pdf]

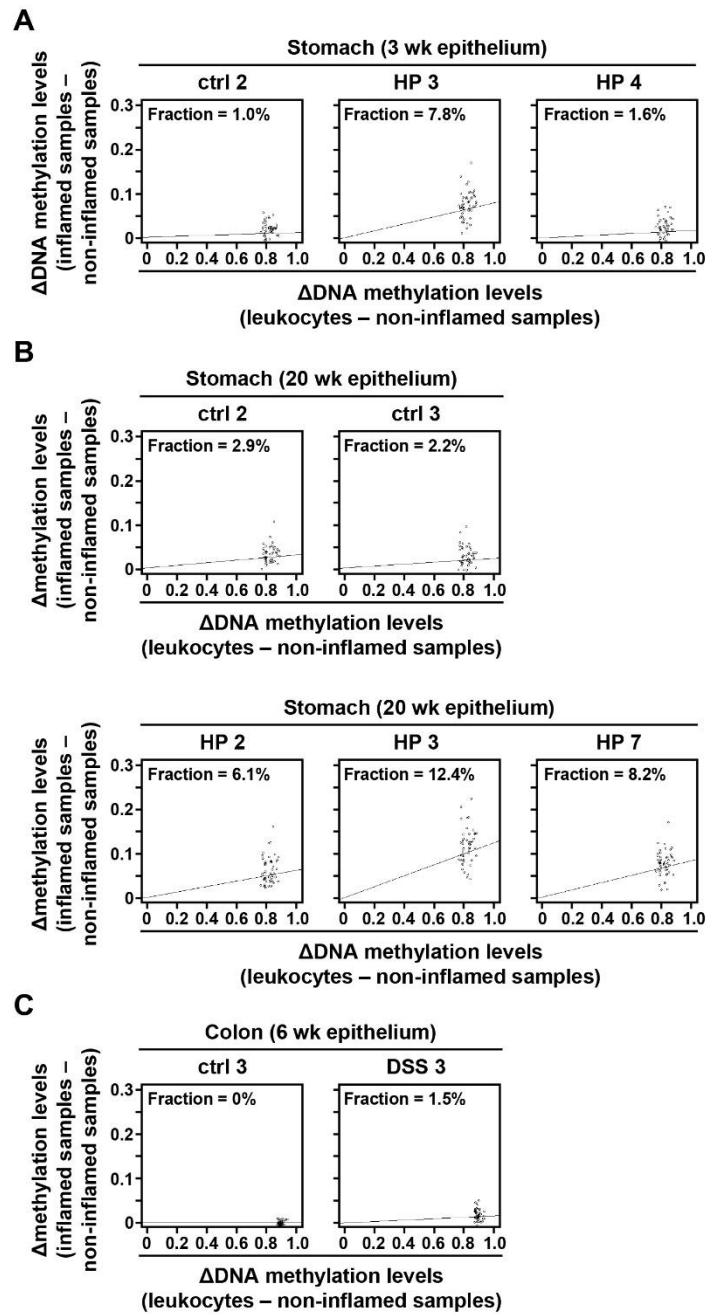**S4 Fig.**

Estimation of a leukocyte fraction in the stomach infected by *H. pylori* for three weeks (A) and 20 weeks (B) and in the DSS-treated colon (C). The fraction of infiltrating leukocytes was 1.4-9.8% in the *H. pylori*-infected stomach, but 0-1.4% in corresponding control samples.
