# Supplementary material for: Mouse methylation profiles for leukocyte cell types, and estimation of leukocyte fractions in inflamed gastrointestinal DNA samples
Source: PubMed Central journal article supplement (PMC10553802; doi:10.1371/journal.pone.0290034), 2023-10-05
Supplement: pone.0290034.s005.pdf [file pone.0290034.s005.pdf]

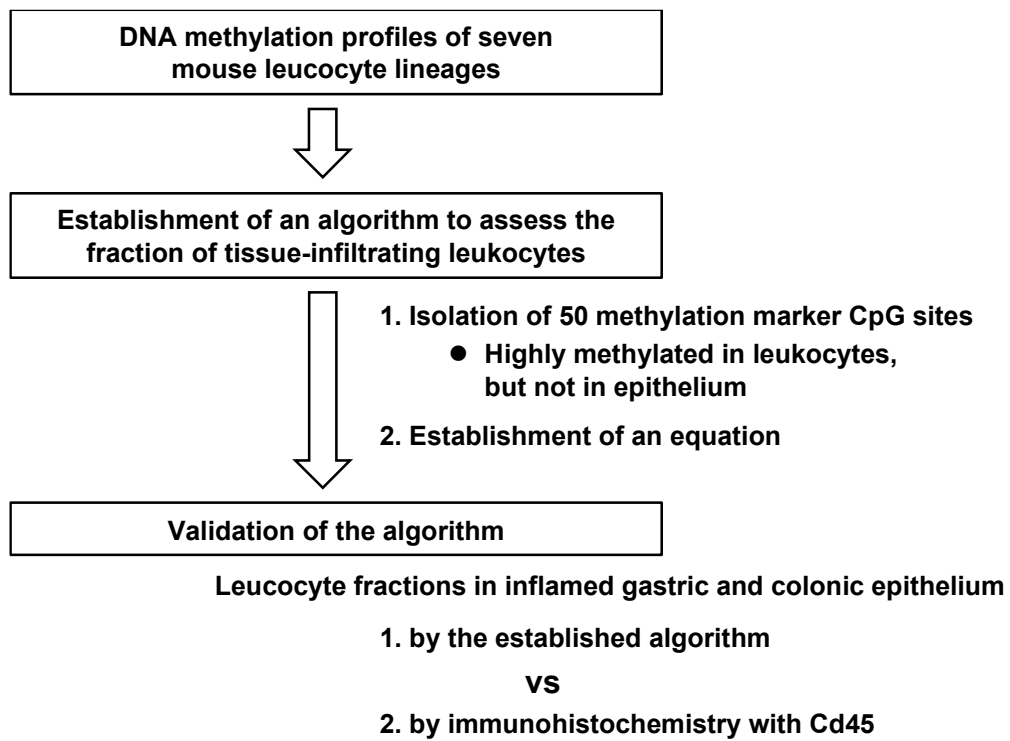

**S5 Fig.**

Diagrammatic summary of the establishment and validation of an estimation algorithm using methylation marker CpG sites to estimate the leukocyte fraction.
