# Supplementary material for: Mouse methylation profiles for leukocyte cell types, and estimation of leukocyte fractions in inflamed gastrointestinal DNA samples
Source: PubMed Central journal article supplement (PMC10553802; doi:10.1371/journal.pone.0290034), 2023-10-05
Supplement: pone.0290034.s006.pdf [file pone.0290034.s006.pdf]

S1 Table. 50 CpG sites used for the estimation of the fraction of infiltrating leukocytes in the stomach.

| Target ID       | Chr | Position  |
|-----------------|-----|-----------|
| cg36848905_TC11 | 1   | 40140081  |
| cg37203122_BC11 | 1   | 89072500  |
| cg38282601_BC21 | 2   | 35692102  |
| cg38425539_TC11 | 2   | 59179234  |
| cg38842623_BC11 | 2   | 117086138 |
| cg39122572_BC11 | 2   | 152785631 |
| cg40463486_TC11 | 3   | 146770057 |
| cg41165791_TC11 | 4   | 97780124  |
| cg41999154_TC21 | 5   | 32141206  |
| cg42136919_TC11 | 5   | 51591711  |
| cg43270580_BC11 | 6   | 31321994  |
| cg43394535_BC21 | 6   | 49097235  |
| cg43763259_TC21 | 6   | 99101625  |
| cg44037310_TC21 | 6   | 134263409 |
| cg44129566_BC11 | 6   | 144056975 |
| cg44516613_BC11 | 7   | 45234605  |
| cg44541537_TC11 | 7   | 46861230  |
| cg44920641_TC21 | 7   | 100943203 |
| cg45136308_BC11 | 7   | 127691822 |
| cg46232196_TC21 | 8   | 117339568 |
| cg46364185_TC11 | 8   | 126525025 |
| cg46843185_TO21 | 9   | 61997996  |
| cg46854722_TC11 | 9   | 63091510  |
| cg46918552_BC11 | 9   | 69457853  |
| cg46966062_BC11 | 9   | 74909477  |
| cg47346773_BC11 | 9   | 118939631 |
| cg47346774_TC11 | 9   | 118939647 |
| cg28150184_BC11 | 10  | 8213398   |
| cg28150186_TC11 | 10  | 8213582   |
| cg28207572_BC11 | 10  | 15760141  |
| cg28381836_TC11 | 10  | 40857783  |
| cg28579406_BC11 | 10  | 66922144  |
| cg28593935_TC11 | 10  | 68127990  |
| cg28879104_BC11 | 10  | 95717495  |

S1 Table. continued.

| Target ID       | Chr | Position  |
|-----------------|-----|-----------|
| cg29089535_BC11 | 10  | 121510420 |
| cg29551928_TC11 | 11  | 54004470  |
| cg29720960_BC21 | 11  | 70466090  |
| cg29903391_BC11 | 11  | 88394725  |
| cg29979572_BC11 | 11  | 96345972  |
| cg30121845_BC11 | 11  | 107337627 |
| cg31999181_TC11 | 13  | 102590227 |
| cg32162476_BC11 | 14  | 7952786   |
| cg33759456_TC11 | 15  | 97376994  |
| cg34843747_BC11 | 17  | 32392621  |
| cg35259852_TC21 | 17  | 80802671  |
| cg35321883_TC11 | 17  | 86780832  |
| cg35449337_TC11 | 18  | 13752113  |
| cg35880862_TC11 | 18  | 69412892  |
| cg36172850_BC11 | 19  | 14424519  |
| cg36521594_TC11 | 19  | 53517470  |
