# Supplementary material for: Mouse methylation profiles for leukocyte cell types, and estimation of leukocyte fractions in inflamed gastrointestinal DNA samples
Source: PubMed Central journal article supplement (PMC10553802; doi:10.1371/journal.pone.0290034), 2023-10-05
Supplement: pone.0290034.s007.pdf [file pone.0290034.s007.pdf]

S2 Table. 50 CpG sites used for the estimation of the fraction of infiltrating leukocytes in the colon.

| Target ID       | Chr | Position  |
|-----------------|-----|-----------|
| cg36799961_TC11 | 1   | 35931161  |
| cg37062550_BC21 | 1   | 71837879  |
| cg37254154_TC21 | 1   | 93731890  |
| cg37710891_TC11 | 1   | 164455315 |
| cg37971074_TC21 | 1   | 191741894 |
| cg38282601_BC21 | 2   | 35692102  |
| cg39122572_BC11 | 2   | 152785631 |
| cg39403390_TC11 | 2   | 178643327 |
| cg39994608_BC21 | 3   | 88496298  |
| cg40940692_TC11 | 4   | 58563453  |
| cg41315512_BC21 | 4   | 116406035 |
| cg42393084_TC21 | 5   | 89219091  |
| cg42466068_BC21 | 5   | 99329099  |
| cg42515217_BC21 | 5   | 103821328 |
| cg43000082_BC21 | 5   | 144342107 |
| cg43261574_TC21 | 6   | 30477630  |
| cg43394535_BC21 | 6   | 49097235  |
| cg43649921_BC21 | 6   | 86233338  |
| cg43763259_TC21 | 6   | 99101625  |
| cg44734127_BC21 | 7   | 75415716  |
| cg45141397_TC11 | 7   | 128032989 |
| cg45894898_TC21 | 8   | 80853792  |
| cg46744723_BC21 | 9   | 51312668  |
| cg46843185_TO21 | 9   | 61997996  |
| cg46854722_TC11 | 9   | 63091510  |
| cg46918552_BC11 | 9   | 69457853  |
| cg46966062_BC11 | 9   | 74909477  |
| cg28185305_BC21 | 10  | 12853278  |
| cg28225140_TC21 | 10  | 18463561  |
| cg28579406_BC11 | 10  | 66922144  |
| cg28879104_BC11 | 10  | 95717495  |
| cg28912610_BC11 | 10  | 100042685 |
| cg29551928_TC11 | 11  | 54004470  |
| cg29921382_TC21 | 11  | 89997113  |

S2 Table. continued.

| Target ID       | Chr | Position  |
|-----------------|-----|-----------|
| cg30216208_BC11 | 11  | 115738784 |
| cg30282083_BC21 | 11  | 119945685 |
| cg31686928_TC11 | 13  | 59454229  |
| cg31716718_BC21 | 13  | 63156326  |
| cg31784497_TC11 | 13  | 72198729  |
| cg32013322_TC21 | 13  | 104037189 |
| cg33040530_TC21 | 15  | 7015259   |
| cg33066706_TC21 | 15  | 10215896  |
| cg33820293_BC21 | 15  | 101370167 |
| cg34596776_TC21 | 17  | 6728294   |
| cg34653758_TC21 | 17  | 12792548  |
| cg34680107_BC21 | 17  | 15824570  |
| cg34780684_BC21 | 17  | 27810676  |
| cg36381747_TC21 | 19  | 40187403  |
| cg36425647_BC21 | 19  | 43889186  |
| cg36521594_TC11 | 19  | 53517470  |
